# Supplementary material for: Unravelling the Impact of Cyclic Mechanical Stretch in Keratoconus—A Transcriptomic Profiling Study
Source: MDPI journal article supplement (doi:10.3390/ijms24087437), 2023-04-18
Supplement: s1 [file s1]

**Supplementary Table S3.** Biological process gene ontology terms for 479 DEGs from HKCs (TGFβ1 + CMS) vs. HCFs (TGFβ1 + CMS) (FDR ≤ 0.05).

|                                                                                                   | Homo sapiens (REF)   |                     | Client Text Box Input (Hierarchy NEW! ?) |                 |     |             |          |
|---------------------------------------------------------------------------------------------------|----------------------|---------------------|------------------------------------------|-----------------|-----|-------------|----------|
| <a href="#">GO biological process complete</a>                                                    | #                    | #                   | expected                                 | Fold Enrichment | +/- | raw P value | FDR      |
| <a href="#">MDA-5 signaling pathway</a>                                                           | <a href="#">4</a>    | <a href="#">3</a>   | .09                                      | 34.55           | +   | 3.13E-04    | 2.74E-02 |
| ↳ <a href="#">cytoplasmic pattern recognition receptor signaling pathway in response to virus</a> | <a href="#">11</a>   | <a href="#">4</a>   | .24                                      | 16.75           | +   | 2.28E-04    | 2.18E-02 |
| ↳ <a href="#">defense response to virus</a>                                                       | <a href="#">253</a>  | <a href="#">27</a>  | 5.49                                     | 4.92            | +   | 6.73E-11    | 8.79E-08 |
| ↳ <a href="#">response to virus</a>                                                               | <a href="#">357</a>  | <a href="#">33</a>  | 7.75                                     | 4.26            | +   | 1.74E-11    | 4.54E-08 |
| ↳ <a href="#">response to other organism</a>                                                      | <a href="#">1429</a> | <a href="#">62</a>  | 31.02                                    | 2.00            | +   | 3.38E-07    | 1.06E-04 |
| ↳ <a href="#">biological process involved in interspecies interaction between organisms</a>       | <a href="#">1602</a> | <a href="#">65</a>  | 34.78                                    | 1.87            | +   | 2.00E-06    | 4.89E-04 |
| ↳ <a href="#">response to external biotic stimulus</a>                                            | <a href="#">1432</a> | <a href="#">63</a>  | 31.09                                    | 2.03            | +   | 1.91E-07    | 6.50E-05 |
| ↳ <a href="#">response to biotic stimulus</a>                                                     | <a href="#">1478</a> | <a href="#">63</a>  | 32.09                                    | 1.96            | +   | 5.05E-07    | 1.47E-04 |
| ↳ <a href="#">response to stimulus</a>                                                            | <a href="#">8209</a> | <a href="#">247</a> | 178.22                                   | 1.39            | +   | 9.18E-11    | 1.03E-07 |
| ↳ <a href="#">response to external stimulus</a>                                                   | <a href="#">2469</a> | <a href="#">107</a> | 53.60                                    | 2.00            | +   | 4.98E-12    | 3.91E-08 |
| ↳ <a href="#">defense response to symbiont</a>                                                    | <a href="#">254</a>  | <a href="#">27</a>  | 5.51                                     | 4.90            | +   | 7.30E-11    | 8.80E-08 |
| ↳ <a href="#">defense response to other organism</a>                                              | <a href="#">1068</a> | <a href="#">49</a>  | 23.19                                    | 2.11            | +   | 1.70E-06    | 4.29E-04 |
| ↳ <a href="#">defense response</a>                                                                | <a href="#">1478</a> | <a href="#">68</a>  | 32.09                                    | 2.12            | +   | 1.14E-08    | 5.44E-06 |
| ↳ <a href="#">response to stress</a>                                                              | <a href="#">3466</a> | <a href="#">107</a> | 75.25                                    | 1.42            | +   | 1.62E-04    | 1.68E-02 |
| ↳ <a href="#">signal transduction</a>                                                             | <a href="#">4887</a> | <a href="#">161</a> | 106.10                                   | 1.52            | +   | 8.88E-09    | 4.35E-06 |

|          |                                                                    |                       |                |            |       |   |              |              |
|----------|--------------------------------------------------------------------|-----------------------|----------------|------------|-------|---|--------------|--------------|
| process  | ↳ <a href="#">regulation of cellular process</a>                   | <a href="#">11187</a> | $\frac{3}{01}$ | 242.<br>88 | 1.24  | + | 3.76E-<br>08 | 1.51<br>E-05 |
|          | ↳ <a href="#">regulation of biological</a>                         | <a href="#">11806</a> | $\frac{3}{20}$ | 256.<br>32 | 1.25  | + | 8.56E-<br>10 | 5.84<br>E-07 |
|          | ↳ <a href="#">biological regulation</a>                            | <a href="#">12544</a> | $\frac{3}{29}$ | 272.<br>34 | 1.21  | + | 3.30E-<br>08 | 1.36<br>E-05 |
|          | ↳ <a href="#">signaling</a>                                        | <a href="#">5231</a>  | $\frac{1}{78}$ | 113.<br>57 | 1.57  | + | 4.96E-<br>11 | 7.06<br>E-08 |
|          | ↳ <a href="#">cellular process</a>                                 | <a href="#">15044</a> | $\frac{3}{68}$ | 326.<br>61 | 1.13  | + | 6.74E-<br>06 | 1.39<br>E-03 |
|          | ↳ <a href="#">cell communication</a>                               | <a href="#">5342</a>  | $\frac{1}{78}$ | 115.<br>98 | 1.53  | + | 2.91E-<br>10 | 2.68<br>E-07 |
| stimulus | ↳ <a href="#">cellular response to stimulus</a>                    | <a href="#">6569</a>  | $\frac{2}{06}$ | 142.<br>62 | 1.44  | + | 6.49E-<br>10 | 4.62<br>E-07 |
|          | ↳ <a href="#">regulation of response to</a>                        | <a href="#">4034</a>  | $\frac{1}{42}$ | 87.5<br>8  | 1.62  | + | 2.09E-<br>09 | 1.22<br>E-06 |
|          | ↳ <a href="#">intracellular signal transduction</a>                | <a href="#">1511</a>  | $\frac{5}{8}$  | 32.8<br>0  | 1.77  | + | 3.56E-<br>05 | 5.26<br>E-03 |
|          | <a href="#">interleukin-27-mediated signaling pathway</a>          | <a href="#">7</a>     | $\frac{4}{}$   | .15        | 26.32 | + | 5.90E-<br>05 | 7.52<br>E-03 |
|          | ↳ <a href="#">cell surface receptor signaling pathway</a>          | <a href="#">2174</a>  | $\frac{7}{7}$  | 47.2<br>0  | 1.63  | + | 2.58E-<br>05 | 4.08<br>E-03 |
|          | ↳ <a href="#">cellular response to cytokine stimulus</a>           | <a href="#">714</a>   | $\frac{3}{4}$  | 15.5<br>0  | 2.19  | + | 4.13E-<br>05 | 5.74<br>E-03 |
|          | ↳ <a href="#">cellular response to organic substance</a>           | <a href="#">2026</a>  | $\frac{7}{0}$  | 43.9<br>9  | 1.59  | + | 1.58E-<br>04 | 1.65<br>E-02 |
|          | ↳ <a href="#">cellular response to chemical stimulus</a>           | <a href="#">2616</a>  | $\frac{9}{7}$  | 56.7<br>9  | 1.71  | + | 2.12E-<br>07 | 6.94<br>E-05 |
|          | ↳ <a href="#">response to chemical</a>                             | <a href="#">4060</a>  | $\frac{1}{24}$ | 88.1<br>5  | 1.41  | + | 5.60E-<br>05 | 7.20<br>E-03 |
|          | ↳ <a href="#">response to cytokine</a>                             | <a href="#">808</a>   | $\frac{3}{9}$  | 17.5<br>4  | 2.22  | + | 7.21E-<br>06 | 1.47<br>E-03 |
|          | <a href="#">protein mono-ADP-ribosylation</a>                      | <a href="#">12</a>    | $\frac{5}{}$   | .26        | 19.19 | + | 2.12E-<br>05 | 3.50<br>E-03 |
|          | <a href="#">sequestering of extracellular ligand from receptor</a> | <a href="#">10</a>    | $\frac{4}{}$   | .22        | 18.42 | + | 1.70E-<br>04 | 1.74<br>E-02 |

|                                                                            |                      |                               |        |       |   |          |          |
|----------------------------------------------------------------------------|----------------------|-------------------------------|--------|-------|---|----------|----------|
| ↳ <a href="#">extracellular negative regulation of signal transduction</a> | <a href="#">12</a>   | <a href="#">4</a>             | .26    | 15.35 | + | 2.99E-04 | 2.68E-02 |
| ↳ <a href="#">extracellular regulation of signal transduction</a>          | <a href="#">12</a>   | <a href="#">4</a>             | .26    | 15.35 | + | 2.99E-04 | 2.66E-02 |
| ↳ <a href="#">regulation of signal transduction</a>                        | <a href="#">2989</a> | <a href="#">1<br/>1<br/>2</a> | 64.89  | 1.73  | + | 7.10E-09 | 3.84E-06 |
| ↳ <a href="#">regulation of cell communication</a>                         | <a href="#">3369</a> | <a href="#">1<br/>2<br/>5</a> | 73.14  | 1.71  | + | 1.09E-09 | 6.81E-07 |
| ↳ <a href="#">regulation of signaling</a>                                  | <a href="#">3381</a> | <a href="#">1<br/>2<br/>7</a> | 73.40  | 1.73  | + | 3.33E-10 | 2.90E-07 |
| ↳ <a href="#">negative regulation of signal transduction</a>               | <a href="#">1257</a> | <a href="#">5<br/>7</a>       | 27.29  | 2.09  | + | 2.88E-07 | 9.21E-05 |
| ↳ <a href="#">negative regulation of cell communication</a>                | <a href="#">1357</a> | <a href="#">5<br/>9</a>       | 29.46  | 2.00  | + | 7.45E-07 | 2.05E-04 |
| ↳ <a href="#">negative regulation of cellular process</a>                  | <a href="#">4732</a> | <a href="#">1<br/>5<br/>5</a> | 102.73 | 1.51  | + | 3.22E-08 | 1.36E-05 |
| ↳ <a href="#">negative regulation of biological process</a>                | <a href="#">5314</a> | <a href="#">1<br/>8<br/>0</a> | 115.37 | 1.56  | + | 4.44E-11 | 6.96E-08 |
| ↳ <a href="#">negative regulation of signaling</a>                         | <a href="#">1363</a> | <a href="#">6<br/>0</a>       | 29.59  | 2.03  | + | 4.70E-07 | 1.39E-04 |
| ↳ <a href="#">negative regulation of response to stimulus</a>              | <a href="#">1620</a> | <a href="#">7<br/>0</a>       | 35.17  | 1.99  | + | 7.99E-08 | 2.98E-05 |
| <a href="#">positive regulation of non-canonical Wnt signaling pathway</a> | <a href="#">15</a>   | <a href="#">4</a>             | .33    | 12.28 | + | 6.05E-04 | 4.52E-02 |
| ↳ <a href="#">regulation of Wnt signaling pathway</a>                      | <a href="#">332</a>  | <a href="#">1<br/>8</a>       | 7.21   | 2.50  | + | 5.43E-04 | 4.13E-02 |
| ↳ <a href="#">positive regulation of signal transduction</a>               | <a href="#">1528</a> | <a href="#">5<br/>9</a>       | 33.17  | 1.78  | + | 2.59E-05 | 4.06E-03 |
| ↳ <a href="#">positive regulation of signaling</a>                         | <a href="#">1701</a> | <a href="#">6<br/>5</a>       | 36.93  | 1.76  | + | 1.33E-05 | 2.40E-03 |
| ↳ <a href="#">positive regulation of biological process</a>                | <a href="#">6304</a> | <a href="#">2<br/>0<br/>0</a> | 136.86 | 1.46  | + | 5.71E-10 | 4.26E-07 |
| ↳ <a href="#">positive regulation of cell communication</a>                | <a href="#">1696</a> | <a href="#">6<br/>5</a>       | 36.82  | 1.77  | + | 1.28E-05 | 2.34E-03 |
| ↳ <a href="#">positive regulation of cellular process</a>                  | <a href="#">5670</a> | <a href="#">1<br/>7<br/>5</a> | 123.10 | 1.42  | + | 1.49E-07 | 5.18E-05 |

|                                                                         |                      |                                                             |           |       |   |              |              |
|-------------------------------------------------------------------------|----------------------|-------------------------------------------------------------|-----------|-------|---|--------------|--------------|
| <a href="#">positive regulation of response to stimulus</a>             | <a href="#">2223</a> | <a href="#">7</a><br><a href="#">9</a>                      | 48.2<br>6 | 1.64  | + | 1.59E-<br>05 | 2.77<br>E-03 |
| <a href="#">fibroblast migration</a>                                    | <a href="#">19</a>   | <a href="#">5</a>                                           | .41       | 12.12 | + | 1.29E-<br>04 | 1.44<br>E-02 |
| <a href="#">cell migration</a>                                          | <a href="#">903</a>  | <a href="#">4</a><br><a href="#">1</a>                      | 19.6<br>0 | 2.09  | + | 1.45E-<br>05 | 2.55<br>E-03 |
| <a href="#">cell motility</a>                                           | <a href="#">1061</a> | <a href="#">4</a><br><a href="#">4</a>                      | 23.0<br>3 | 1.91  | + | 6.09E-<br>05 | 7.70<br>E-03 |
| <a href="#">mesenchymal cell proliferation</a>                          | <a href="#">28</a>   | <a href="#">5</a>                                           | .61       | 8.23  | + | 6.15E-<br>04 | 4.57<br>E-02 |
| <a href="#">cell population proliferation</a>                           | <a href="#">718</a>  | <a href="#">3</a><br><a href="#">1</a>                      | 15.5<br>9 | 1.99  | + | 4.14E-<br>04 | 3.33<br>E-02 |
| <a href="#">negative regulation of viral genome replication</a>         | <a href="#">57</a>   | <a href="#">1</a><br><a href="#">0</a>                      | 1.24      | 8.08  | + | 1.43E-<br>06 | 3.67<br>E-04 |
| <a href="#">regulation of viral genome replication</a>                  | <a href="#">87</a>   | <a href="#">1</a><br><a href="#">0</a>                      | 1.89      | 5.29  | + | 4.10E-<br>05 | 5.80<br>E-03 |
| <a href="#">regulation of viral life cycle</a>                          | <a href="#">142</a>  | <a href="#">1</a><br><a href="#">2</a>                      | 3.08      | 3.89  | + | 1.15E-<br>04 | 1.31<br>E-02 |
| <a href="#">regulation of viral process</a>                             | <a href="#">164</a>  | <a href="#">1</a><br><a href="#">4</a>                      | 3.56      | 3.93  | + | 2.86E-<br>05 | 4.36<br>E-03 |
| <a href="#">negative regulation of viral process</a>                    | <a href="#">95</a>   | <a href="#">1</a><br><a href="#">4</a>                      | 2.06      | 6.79  | + | 7.97E-<br>08 | 3.05<br>E-05 |
| <a href="#">cell adhesion mediated by integrin</a>                      | <a href="#">41</a>   | <a href="#">6</a>                                           | .89       | 6.74  | + | 4.57E-<br>04 | 3.62<br>E-02 |
| <a href="#">cell adhesion</a>                                           | <a href="#">969</a>  | <a href="#">5</a><br><a href="#">7</a>                      | 21.0<br>4 | 2.71  | + | 3.14E-<br>11 | 6.16<br>E-08 |
| <a href="#">positive regulation of interferon-beta production</a>       | <a href="#">41</a>   | <a href="#">6</a>                                           | .89       | 6.74  | + | 4.57E-<br>04 | 3.60<br>E-02 |
| <a href="#">regulation of cytokine production</a>                       | <a href="#">742</a>  | <a href="#">3</a><br><a href="#">7</a>                      | 16.1<br>1 | 2.30  | + | 5.52E-<br>06 | 1.22<br>E-03 |
| <a href="#">regulation of multicellular organismal process</a>          | <a href="#">2750</a> | <a href="#">1</a><br><a href="#">0</a><br><a href="#">9</a> | 59.7<br>0 | 1.83  | + | 5.29E-<br>10 | 4.15<br>E-07 |
| <a href="#">positive regulation of cytokine production</a>              | <a href="#">481</a>  | <a href="#">2</a><br><a href="#">4</a>                      | 10.4<br>4 | 2.30  | + | 2.43E-<br>04 | 2.27<br>E-02 |
| <a href="#">positive regulation of multicellular organismal process</a> | <a href="#">1515</a> | <a href="#">6</a><br><a href="#">3</a>                      | 32.8<br>9 | 1.92  | + | 1.13E-<br>06 | 2.94<br>E-04 |
| <a href="#">regulation of interferon-beta production</a>                | <a href="#">58</a>   | <a href="#">7</a>                                           | 1.26      | 5.56  | + | 4.49E-<br>04 | 3.59<br>E-02 |
| <a href="#">cellular response to type I interferon</a>                  | <a href="#">44</a>   | <a href="#">6</a>                                           | .96       | 6.28  | + | 6.41E-<br>04 | 4.72<br>E-02 |
| <a href="#">response to type I interferon</a>                           | <a href="#">52</a>   | <a href="#">8</a>                                           | 1.13      | 7.09  | + | 3.80E-<br>05 | 5.46<br>E-03 |

|                                                                          |                      |                                                             |            |      |   |              |              |
|--------------------------------------------------------------------------|----------------------|-------------------------------------------------------------|------------|------|---|--------------|--------------|
| ↳ <a href="#">innate immune response</a>                                 | <a href="#">832</a>  | <a href="#">4</a><br><a href="#">3</a>                      | 18.0<br>6  | 2.38 | + | 4.12E-<br>07 | 1.24<br>E-04 |
| ↳ <a href="#">immune response</a>                                        | <a href="#">1621</a> | <a href="#">6</a><br><a href="#">4</a>                      | 35.1<br>9  | 1.82 | + | 5.52E-<br>06 | 1.20<br>E-03 |
| ↳ <a href="#">immune system process</a>                                  | <a href="#">2429</a> | <a href="#">9</a><br><a href="#">0</a>                      | 52.7<br>4  | 1.71 | + | 6.34E-<br>07 | 1.81<br>E-04 |
| <a href="#">negative regulation of innate immune response</a>            | <a href="#">76</a>   | <a href="#">1</a><br><a href="#">0</a>                      | 1.65       | 6.06 | + | 1.42E-<br>05 | 2.53<br>E-03 |
| ↳ <a href="#">negative regulation of response to external stimulus</a>   | <a href="#">391</a>  | <a href="#">2</a><br><a href="#">1</a>                      | 8.49       | 2.47 | + | 3.49E-<br>04 | 2.91<br>E-02 |
| ↳ <a href="#">regulation of response to external stimulus</a>            | <a href="#">973</a>  | <a href="#">4</a><br><a href="#">5</a>                      | 21.1<br>2  | 2.13 | + | 3.39E-<br>06 | 7.93<br>E-04 |
| ↳ <a href="#">negative regulation of response to biotic stimulus</a>     | <a href="#">114</a>  | <a href="#">1</a><br><a href="#">0</a>                      | 2.48       | 4.04 | + | 3.21E-<br>04 | 2.78<br>E-02 |
| ↳ <a href="#">regulation of response to biotic stimulus</a>              | <a href="#">364</a>  | <a href="#">2</a><br><a href="#">2</a>                      | 7.90       | 2.78 | + | 3.02E-<br>05 | 4.55<br>E-03 |
| ↳ <a href="#">regulation of defense response</a>                         | <a href="#">642</a>  | <a href="#">3</a><br><a href="#">3</a>                      | 13.9<br>4  | 2.37 | + | 9.17E-<br>06 | 1.77<br>E-03 |
| ↳ <a href="#">negative regulation of defense response</a>                | <a href="#">236</a>  | <a href="#">1</a><br><a href="#">5</a>                      | 5.12       | 2.93 | + | 3.31E-<br>04 | 2.81<br>E-02 |
| <a href="#">regulation of actin filament depolymerization</a>            | <a href="#">56</a>   | <a href="#">7</a>                                           | 1.22       | 5.76 | + | 3.70E-<br>04 | 3.07<br>E-02 |
| ↳ <a href="#">regulation of cellular component organization</a>          | <a href="#">2364</a> | <a href="#">8</a><br><a href="#">2</a>                      | 51.3<br>2  | 1.60 | + | 2.63E-<br>05 | 4.04<br>E-03 |
| ↳ <a href="#">regulation of actin polymerization or depolymerization</a> | <a href="#">158</a>  | <a href="#">1</a><br><a href="#">2</a>                      | 3.43       | 3.50 | + | 2.91E-<br>04 | 2.62<br>E-02 |
| ↳ <a href="#">regulation of actin filament length</a>                    | <a href="#">161</a>  | <a href="#">1</a><br><a href="#">2</a>                      | 3.50       | 3.43 | + | 3.41E-<br>04 | 2.86<br>E-02 |
| ↳ <a href="#">regulation of actin cytoskeleton organization</a>          | <a href="#">364</a>  | <a href="#">2</a><br><a href="#">1</a>                      | 7.90       | 2.66 | + | 8.53E-<br>05 | 1.01<br>E-02 |
| ↳ <a href="#">regulation of actin filament-based process</a>             | <a href="#">405</a>  | <a href="#">2</a><br><a href="#">4</a>                      | 8.79       | 2.73 | + | 1.79E-<br>05 | 3.06<br>E-03 |
| ↳ <a href="#">regulation of cellular component size</a>                  | <a href="#">372</a>  | <a href="#">2</a><br><a href="#">1</a>                      | 8.08       | 2.60 | + | 1.14E-<br>04 | 1.30<br>E-02 |
| ↳ <a href="#">cellular component organization</a>                        | <a href="#">5523</a> | <a href="#">1</a><br><a href="#">6</a><br><a href="#">1</a> | 119.<br>91 | 1.34 | + | 2.54E-<br>05 | 4.06<br>E-03 |
| ↳ <a href="#">cellular component organization or biogenesis</a>          | <a href="#">5727</a> | <a href="#">1</a><br><a href="#">6</a><br><a href="#">1</a> | 124.<br>34 | 1.29 | + | 1.88E-<br>04 | 1.89<br>E-02 |

|      |                                                                  |                      |                                                             |            |      |   |              |              |
|------|------------------------------------------------------------------|----------------------|-------------------------------------------------------------|------------|------|---|--------------|--------------|
| size | <a href="#">regulation of anatomical structure</a>               | <a href="#">511</a>  | <a href="#">2</a><br><a href="#">7</a>                      | 11.0<br>9  | 2.43 | + | 4.53E-<br>05 | 6.08<br>E-03 |
|      | <a href="#">regulation of actin filament organization</a>        | <a href="#">276</a>  | <a href="#">1</a><br><a href="#">6</a>                      | 5.99       | 2.67 | + | 5.53E-<br>04 | 4.19<br>E-02 |
|      | <a href="#">regulation of establishment of planar polarity</a>   | <a href="#">58</a>   | <a href="#">7</a>                                           | 1.26       | 5.56 | + | 4.49E-<br>04 | 3.57<br>E-02 |
|      | <a href="#">regulation of anatomical structure morphogenesis</a> | <a href="#">924</a>  | <a href="#">5</a><br><a href="#">0</a>                      | 20.0<br>6  | 2.49 | + | 8.44E-<br>09 | 4.27<br>E-06 |
|      | <a href="#">regulation of developmental process</a>              | <a href="#">2489</a> | <a href="#">1</a><br><a href="#">0</a><br><a href="#">3</a> | 54.0<br>4  | 1.91 | + | 2.11E-<br>10 | 2.07<br>E-07 |
|      | <a href="#">collagen fibril organization</a>                     | <a href="#">60</a>   | <a href="#">7</a>                                           | 1.30       | 5.37 | + | 5.41E-<br>04 | 4.14<br>E-02 |
|      | <a href="#">supramolecular fiber organization</a>                | <a href="#">580</a>  | <a href="#">2</a><br><a href="#">9</a>                      | 12.5<br>9  | 2.30 | + | 7.47E-<br>05 | 9.15<br>E-03 |
|      | <a href="#">extracellular matrix organization</a>                | <a href="#">280</a>  | <a href="#">3</a><br><a href="#">0</a>                      | 6.08       | 4.94 | + | 5.22E-<br>12 | 2.73<br>E-08 |
|      | <a href="#">extracellular structure organization</a>             | <a href="#">281</a>  | <a href="#">3</a><br><a href="#">0</a>                      | 6.10       | 4.92 | + | 5.67E-<br>12 | 2.22<br>E-08 |
|      | <a href="#">external encapsulating structure organization</a>    | <a href="#">283</a>  | <a href="#">3</a><br><a href="#">0</a>                      | 6.14       | 4.88 | + | 6.67E-<br>12 | 2.09<br>E-08 |
|      | <a href="#">nephron tubule development</a>                       | <a href="#">83</a>   | <a href="#">9</a>                                           | 1.80       | 4.99 | + | 1.49E-<br>04 | 1.59<br>E-02 |
|      | <a href="#">renal tubule development</a>                         | <a href="#">87</a>   | <a href="#">1</a><br><a href="#">0</a>                      | 1.89       | 5.29 | + | 4.10E-<br>05 | 5.75<br>E-03 |
|      | <a href="#">tube development</a>                                 | <a href="#">885</a>  | <a href="#">3</a><br><a href="#">9</a>                      | 19.2<br>1  | 2.03 | + | 5.37E-<br>05 | 6.96<br>E-03 |
|      | <a href="#">anatomical structure development</a>                 | <a href="#">5144</a> | <a href="#">1</a><br><a href="#">7</a><br><a href="#">6</a> | 111.<br>68 | 1.58 | + | 3.94E-<br>11 | 6.87<br>E-08 |
|      | <a href="#">developmental process</a>                            | <a href="#">5677</a> | <a href="#">1</a><br><a href="#">9</a><br><a href="#">0</a> | 123.<br>25 | 1.54 | + | 2.51E-<br>11 | 5.62<br>E-08 |
|      | <a href="#">multicellular organism development</a>               | <a href="#">4228</a> | <a href="#">1</a><br><a href="#">5</a><br><a href="#">6</a> | 91.7<br>9  | 1.70 | + | 3.35E-<br>12 | 5.25<br>E-08 |
|      | <a href="#">multicellular organismal process</a>                 | <a href="#">6581</a> | <a href="#">2</a><br><a href="#">0</a><br><a href="#">2</a> | 142.<br>88 | 1.41 | + | 8.33E-<br>09 | 4.35<br>E-06 |
|      | <a href="#">tissue development</a>                               | <a href="#">1726</a> | <a href="#">7</a><br><a href="#">2</a>                      | 37.4<br>7  | 1.92 | + | 1.91E-<br>07 | 6.36<br>E-05 |
|      | <a href="#">renal system development</a>                         | <a href="#">308</a>  | <a href="#">2</a><br><a href="#">1</a>                      | 6.69       | 3.14 | + | 8.49E-<br>06 | 1.66<br>E-03 |

|                                                                            |                      |                                                             |           |      |   |              |              |
|----------------------------------------------------------------------------|----------------------|-------------------------------------------------------------|-----------|------|---|--------------|--------------|
| ↳ <a href="#">system development</a>                                       | <a href="#">3838</a> | <a href="#">1</a><br><a href="#">4</a><br><a href="#">1</a> | 83.3<br>3 | 1.69 | + | 9.63E-<br>11 | 1.01<br>E-07 |
| ↳ <a href="#">urogenital system development</a>                            | <a href="#">350</a>  | <a href="#">2</a><br><a href="#">4</a><br><a href="#">4</a> | 7.60      | 3.16 | + | 1.77E-<br>06 | 4.40<br>E-04 |
| ↳ <a href="#">nephron epithelium development</a>                           | <a href="#">106</a>  | <a href="#">1</a><br><a href="#">0</a><br><a href="#">0</a> | 2.30      | 4.35 | + | 1.86E-<br>04 | 1.88<br>E-02 |
| ↳ <a href="#">kidney epithelium development</a>                            | <a href="#">137</a>  | <a href="#">1</a><br><a href="#">1</a><br><a href="#">1</a> | 2.97      | 3.70 | + | 3.32E-<br>04 | 2.80<br>E-02 |
| ↳ <a href="#">kidney development</a>                                       | <a href="#">299</a>  | <a href="#">2</a><br><a href="#">1</a><br><a href="#">1</a> | 6.49      | 3.24 | + | 5.55E-<br>06 | 1.19<br>E-03 |
| ↳ <a href="#">animal organ development</a>                                 | <a href="#">3254</a> | <a href="#">1</a><br><a href="#">1</a><br><a href="#">6</a> | 70.6<br>5 | 1.64 | + | 6.91E-<br>08 | 2.71<br>E-05 |
| ↳ <a href="#">nephron development</a>                                      | <a href="#">135</a>  | <a href="#">1</a><br><a href="#">2</a><br><a href="#">2</a> | 2.93      | 4.09 | + | 7.38E-<br>05 | 9.11<br>E-03 |
| <a href="#">negative regulation of cytokine-mediated signaling pathway</a> | <a href="#">75</a>   | <a href="#">8</a><br><a href="#">8</a><br><a href="#">8</a> | 1.63      | 4.91 | + | 3.83E-<br>04 | 3.16<br>E-02 |
| ↳ <a href="#">negative regulation of response to cytokine stimulus</a>     | <a href="#">79</a>   | <a href="#">8</a><br><a href="#">8</a><br><a href="#">8</a> | 1.72      | 4.66 | + | 5.26E-<br>04 | 4.11<br>E-02 |
| <a href="#">transport across blood-brain barrier</a>                       | <a href="#">86</a>   | <a href="#">9</a><br><a href="#">9</a><br><a href="#">9</a> | 1.87      | 4.82 | + | 1.91E-<br>04 | 1.89<br>E-02 |
| ↳ <a href="#">vascular transport</a>                                       | <a href="#">86</a>   | <a href="#">9</a><br><a href="#">9</a><br><a href="#">9</a> | 1.87      | 4.82 | + | 1.91E-<br>04 | 1.90<br>E-02 |
| ↳ <a href="#">vascular process in circulatory system</a>                   | <a href="#">267</a>  | <a href="#">1</a><br><a href="#">7</a><br><a href="#">7</a> | 5.80      | 2.93 | + | 1.33E-<br>04 | 1.45<br>E-02 |
| ↳ <a href="#">circulatory system process</a>                               | <a href="#">498</a>  | <a href="#">2</a><br><a href="#">4</a><br><a href="#">4</a> | 10.8<br>1 | 2.22 | + | 5.14E-<br>04 | 4.03<br>E-02 |
| <a href="#">inner ear morphogenesis</a>                                    | <a href="#">109</a>  | <a href="#">1</a><br><a href="#">1</a><br><a href="#">1</a> | 2.37      | 4.65 | + | 5.12E-<br>05 | 6.75<br>E-03 |
| ↳ <a href="#">ear morphogenesis</a>                                        | <a href="#">130</a>  | <a href="#">1</a><br><a href="#">3</a><br><a href="#">3</a> | 2.82      | 4.61 | + | 1.18E-<br>05 | 2.19<br>E-03 |
| ↳ <a href="#">ear development</a>                                          | <a href="#">232</a>  | <a href="#">1</a><br><a href="#">7</a><br><a href="#">7</a> | 5.04      | 3.38 | + | 2.61E-<br>05 | 4.05<br>E-03 |
| ↳ <a href="#">sensory organ development</a>                                | <a href="#">582</a>  | <a href="#">3</a><br><a href="#">2</a><br><a href="#">2</a> | 12.6<br>4 | 2.53 | + | 4.80E-<br>06 | 1.07<br>E-03 |
| ↳ <a href="#">sensory organ morphogenesis</a>                              | <a href="#">279</a>  | <a href="#">2</a><br><a href="#">3</a><br><a href="#">3</a> | 6.06      | 3.80 | + | 1.48E-<br>07 | 5.28<br>E-05 |
| ↳ <a href="#">animal organ morphogenesis</a>                               | <a href="#">1003</a> | <a href="#">4</a><br><a href="#">6</a><br><a href="#">6</a> | 21.7<br>8 | 2.11 | + | 4.29E-<br>06 | 9.75<br>E-04 |
| ↳ <a href="#">anatomical structure morphogenesis</a>                       | <a href="#">2237</a> | <a href="#">9</a><br><a href="#">4</a><br><a href="#">4</a> | 48.5<br>7 | 1.94 | + | 9.69E-<br>10 | 6.33<br>E-07 |

|                                                                                 |                      |                               |       |      |   |          |          |
|---------------------------------------------------------------------------------|----------------------|-------------------------------|-------|------|---|----------|----------|
| <a href="#">↳embryonic organ morphogenesis</a>                                  | <a href="#">301</a>  | <a href="#">1<br/>8</a>       | 6.53  | 2.75 | + | 1.78E-04 | 1.81E-02 |
| <a href="#">↳embryonic organ development</a>                                    | <a href="#">454</a>  | <a href="#">2<br/>4</a>       | 9.86  | 2.43 | + | 1.30E-04 | 1.43E-02 |
| <a href="#">↳embryo development</a>                                             | <a href="#">1059</a> | <a href="#">4<br/>5</a>       | 22.99 | 1.96 | + | 3.48E-05 | 5.20E-03 |
| <a href="#">↳embryonic morphogenesis</a>                                        | <a href="#">591</a>  | <a href="#">3<br/>2</a>       | 12.83 | 2.49 | + | 5.67E-06 | 1.20E-03 |
| <a href="#">↳inner ear development</a>                                          | <a href="#">204</a>  | <a href="#">1<br/>4</a>       | 4.43  | 3.16 | + | 2.51E-04 | 2.32E-02 |
| <a href="#">integrin-mediated signaling pathway</a>                             | <a href="#">101</a>  | <a href="#">1<br/>0</a>       | 2.19  | 4.56 | + | 1.29E-04 | 1.44E-02 |
| <a href="#">response to retinoic acid</a>                                       | <a href="#">113</a>  | <a href="#">1<br/>0</a>       | 2.45  | 4.08 | + | 3.00E-04 | 2.66E-02 |
| <a href="#">actomyosin structure organization</a>                               | <a href="#">114</a>  | <a href="#">1<br/>0</a>       | 2.48  | 4.04 | + | 3.21E-04 | 2.79E-02 |
| <a href="#">↳actin cytoskeleton organization</a>                                | <a href="#">549</a>  | <a href="#">3<br/>0</a>       | 11.92 | 2.52 | + | 1.08E-05 | 2.06E-03 |
| <a href="#">↳actin filament-based process</a>                                   | <a href="#">611</a>  | <a href="#">3<br/>3</a>       | 13.27 | 2.49 | + | 4.07E-06 | 9.38E-04 |
| <a href="#">eye morphogenesis</a>                                               | <a href="#">160</a>  | <a href="#">1<br/>2</a>       | 3.47  | 3.45 | + | 3.24E-04 | 2.79E-02 |
| <a href="#">homophilic cell adhesion via plasma membrane adhesion molecules</a> | <a href="#">170</a>  | <a href="#">1<br/>2</a>       | 3.69  | 3.25 | + | 5.39E-04 | 4.17E-02 |
| <a href="#">↳cell-cell adhesion</a>                                             | <a href="#">543</a>  | <a href="#">3<br/>4</a>       | 11.79 | 2.88 | + | 9.55E-08 | 3.48E-05 |
| <a href="#">mesenchymal cell differentiation</a>                                | <a href="#">171</a>  | <a href="#">1<br/>2</a>       | 3.71  | 3.23 | + | 5.66E-04 | 4.27E-02 |
| <a href="#">↳cell differentiation</a>                                           | <a href="#">3519</a> | <a href="#">1<br/>1<br/>9</a> | 76.40 | 1.56 | + | 6.82E-07 | 1.91E-04 |
| <a href="#">↳cellular developmental process</a>                                 | <a href="#">3542</a> | <a href="#">1<br/>1<br/>9</a> | 76.90 | 1.55 | + | 1.01E-06 | 2.69E-04 |
| <a href="#">↳mesenchyme development</a>                                         | <a href="#">239</a>  | <a href="#">1<br/>7</a>       | 5.19  | 3.28 | + | 3.70E-05 | 5.38E-03 |
| <a href="#">negative regulation of cell migration</a>                           | <a href="#">288</a>  | <a href="#">1<br/>7</a>       | 6.25  | 2.72 | + | 3.08E-04 | 2.72E-02 |
| <a href="#">↳negative regulation of cell motility</a>                           | <a href="#">303</a>  | <a href="#">1<br/>9</a>       | 6.58  | 2.89 | + | 6.59E-05 | 8.20E-03 |
| <a href="#">↳negative regulation of locomotion</a>                              | <a href="#">339</a>  | <a href="#">2<br/>2</a>       | 7.36  | 2.99 | + | 1.08E-05 | 2.04E-03 |

|                                                                                     |                      |                                        |           |      |   |          |          |
|-------------------------------------------------------------------------------------|----------------------|----------------------------------------|-----------|------|---|----------|----------|
| <a href="#">↳regulation of locomotion</a>                                           | <a href="#">1034</a> | <a href="#">5</a><br><a href="#">5</a> | 22.4<br>5 | 2.45 | + | 3.30E-09 | 1.85E-06 |
| <a href="#">↳regulation of cell motility</a>                                        | <a href="#">989</a>  | <a href="#">5</a><br><a href="#">4</a> | 21.4<br>7 | 2.51 | + | 1.50E-09 | 9.06E-07 |
| <a href="#">↳regulation of cell migration</a>                                       | <a href="#">929</a>  | <a href="#">5</a><br><a href="#">3</a> | 20.1<br>7 | 2.63 | + | 4.69E-10 | 3.87E-07 |
| <a href="#">positive regulation of nervous system development</a>                   | <a href="#">279</a>  | <a href="#">1</a><br><a href="#">6</a> | 6.06      | 2.64 | + | 6.18E-04 | 4.57E-02 |
| <a href="#">↳positive regulation of developmental process</a>                       | <a href="#">1339</a> | <a href="#">5</a><br><a href="#">3</a> | 29.0<br>7 | 1.82 | + | 4.33E-05 | 5.95E-03 |
| <a href="#">↳regulation of nervous system development</a>                           | <a href="#">452</a>  | <a href="#">2</a><br><a href="#">5</a> | 9.81      | 2.55 | + | 3.56E-05 | 5.22E-03 |
| <a href="#">↳regulation of multicellular organismal development</a>                 | <a href="#">1383</a> | <a href="#">5</a><br><a href="#">8</a> | 30.0<br>3 | 1.93 | + | 2.60E-06 | 6.27E-04 |
| <a href="#">regulation of cell morphogenesis</a>                                    | <a href="#">314</a>  | <a href="#">1</a><br><a href="#">8</a> | 6.82      | 2.64 | + | 2.90E-04 | 2.63E-02 |
| <a href="#">regulation of ERK1 and ERK2 cascade</a>                                 | <a href="#">303</a>  | <a href="#">1</a><br><a href="#">7</a> | 6.58      | 2.58 | + | 5.34E-04 | 4.14E-02 |
| <a href="#">cell morphogenesis involved in neuron differentiation</a>               | <a href="#">440</a>  | <a href="#">2</a><br><a href="#">3</a> | 9.55      | 2.41 | + | 2.04E-04 | 1.99E-02 |
| <a href="#">↳cell development</a>                                                   | <a href="#">1725</a> | <a href="#">6</a><br><a href="#">0</a> | 37.4<br>5 | 1.60 | + | 3.98E-04 | 3.22E-02 |
| <a href="#">↳cell morphogenesis</a>                                                 | <a href="#">713</a>  | <a href="#">3</a><br><a href="#">4</a> | 15.4<br>8 | 2.20 | + | 4.08E-05 | 5.82E-03 |
| <a href="#">↳neuron development</a>                                                 | <a href="#">843</a>  | <a href="#">3</a><br><a href="#">7</a> | 18.3<br>0 | 2.02 | + | 9.96E-05 | 1.15E-02 |
| <a href="#">↳neuron differentiation</a>                                             | <a href="#">1065</a> | <a href="#">4</a><br><a href="#">1</a> | 23.1<br>2 | 1.77 | + | 5.40E-04 | 4.15E-02 |
| <a href="#">↳generation of neurons</a>                                              | <a href="#">1134</a> | <a href="#">4</a><br><a href="#">5</a> | 24.6<br>2 | 1.83 | + | 1.53E-04 | 1.61E-02 |
| <a href="#">↳neurogenesis</a>                                                       | <a href="#">1290</a> | <a href="#">5</a><br><a href="#">1</a> | 28.0<br>1 | 1.82 | + | 5.13E-05 | 6.71E-03 |
| <a href="#">↳nervous system development</a>                                         | <a href="#">2191</a> | <a href="#">8</a><br><a href="#">8</a> | 47.5<br>7 | 1.85 | + | 3.10E-08 | 1.35E-05 |
| <a href="#">muscle structure development</a>                                        | <a href="#">499</a>  | <a href="#">2</a><br><a href="#">6</a> | 10.8<br>3 | 2.40 | + | 7.52E-05 | 9.14E-03 |
| <a href="#">regulation of neuron projection development</a>                         | <a href="#">445</a>  | <a href="#">2</a><br><a href="#">3</a> | 9.66      | 2.38 | + | 2.27E-04 | 2.18E-02 |
| <a href="#">↳regulation of plasma membrane bounded cell projection organization</a> | <a href="#">640</a>  | <a href="#">3</a><br><a href="#">0</a> | 13.8<br>9 | 2.16 | + | 1.68E-04 | 1.74E-02 |
| <a href="#">↳regulation of cell projection organization</a>                         | <a href="#">656</a>  | <a href="#">3</a><br><a href="#">0</a> | 14.2<br>4 | 2.11 | + | 2.10E-04 | 2.03E-02 |

|                                                                          |                      |                                        |           |      |   |          |              |
|--------------------------------------------------------------------------|----------------------|----------------------------------------|-----------|------|---|----------|--------------|
| <a href="#">blood vessel development</a>                                 | <a href="#">510</a>  | <a href="#">2</a><br><a href="#">6</a> | 11.0<br>7 | 2.35 | + | 9.86E-05 | 1.14<br>E-02 |
| ↳ <a href="#">vasculature development</a>                                | <a href="#">532</a>  | <a href="#">2</a><br><a href="#">7</a> | 11.5<br>5 | 2.34 | + | 7.62E-05 | 9.12<br>E-03 |
| ↳ <a href="#">circulatory system development</a>                         | <a href="#">909</a>  | <a href="#">4</a><br><a href="#">2</a> | 19.7<br>3 | 2.13 | + | 8.19E-06 | 1.62<br>E-03 |
| <a href="#">neuron projection morphogenesis</a>                          | <a href="#">479</a>  | <a href="#">2</a><br><a href="#">4</a> | 10.4<br>0 | 2.31 | + | 2.31E-04 | 2.18<br>E-02 |
| ↳ <a href="#">plasma membrane bounded cell projection morphogenesis</a>  | <a href="#">484</a>  | <a href="#">2</a><br><a href="#">4</a> | 10.5<br>1 | 2.28 | + | 2.62E-04 | 2.39<br>E-02 |
| ↳ <a href="#">cell projection morphogenesis</a>                          | <a href="#">489</a>  | <a href="#">2</a><br><a href="#">5</a> | 10.6<br>2 | 2.35 | + | 1.31E-04 | 1.44<br>E-02 |
| ↳ <a href="#">cell part morphogenesis</a>                                | <a href="#">508</a>  | <a href="#">2</a><br><a href="#">5</a> | 11.0<br>3 | 2.27 | + | 3.24E-04 | 2.77<br>E-02 |
| ↳ <a href="#">cellular component morphogenesis</a>                       | <a href="#">604</a>  | <a href="#">3</a><br><a href="#">1</a> | 13.1<br>1 | 2.36 | + | 1.79E-05 | 3.09<br>E-03 |
| <a href="#">positive regulation of cell migration</a>                    | <a href="#">532</a>  | <a href="#">2</a><br><a href="#">6</a> | 11.5<br>5 | 2.25 | + | 2.42E-04 | 2.27<br>E-02 |
| ↳ <a href="#">positive regulation of cell motility</a>                   | <a href="#">558</a>  | <a href="#">2</a><br><a href="#">6</a> | 12.1<br>1 | 2.15 | + | 3.87E-04 | 3.16<br>E-02 |
| ↳ <a href="#">positive regulation of locomotion</a>                      | <a href="#">574</a>  | <a href="#">2</a><br><a href="#">7</a> | 12.4<br>6 | 2.17 | + | 2.61E-04 | 2.39<br>E-02 |
| <a href="#">negative regulation of multicellular organismal process</a>  | <a href="#">1039</a> | <a href="#">5</a><br><a href="#">0</a> | 22.5<br>6 | 2.22 | + | 3.67E-07 | 1.13<br>E-04 |
| <a href="#">tissue morphogenesis</a>                                     | <a href="#">568</a>  | <a href="#">2</a><br><a href="#">7</a> | 12.3<br>3 | 2.19 | + | 2.31E-04 | 2.19<br>E-02 |
| <a href="#">tube morphogenesis</a>                                       | <a href="#">673</a>  | <a href="#">3</a><br><a href="#">1</a> | 14.6<br>1 | 2.12 | + | 1.45E-04 | 1.56<br>E-02 |
| <a href="#">anatomical structure formation involved in morphogenesis</a> | <a href="#">941</a>  | <a href="#">4</a><br><a href="#">3</a> | 20.4<br>3 | 2.10 | + | 7.45E-06 | 1.50<br>E-03 |
| <a href="#">negative regulation of cell population proliferation</a>     | <a href="#">713</a>  | <a href="#">3</a><br><a href="#">1</a> | 15.4<br>8 | 2.00 | + | 3.85E-04 | 3.16<br>E-02 |
| ↳ <a href="#">regulation of cell population proliferation</a>            | <a href="#">1674</a> | <a href="#">6</a><br><a href="#">8</a> | 36.3<br>4 | 1.87 | + | 8.97E-07 | 2.43<br>E-04 |
| <a href="#">positive regulation of cell differentiation</a>              | <a href="#">884</a>  | <a href="#">3</a><br><a href="#">8</a> | 19.1<br>9 | 1.98 | + | 9.61E-05 | 1.12<br>E-02 |
| ↳ <a href="#">regulation of cell differentiation</a>                     | <a href="#">1581</a> | <a href="#">6</a><br><a href="#">4</a> | 34.3<br>2 | 1.86 | + | 2.70E-06 | 6.41<br>E-04 |
| <a href="#">central nervous system development</a>                       | <a href="#">1034</a> | <a href="#">4</a><br><a href="#">3</a> | 22.4<br>5 | 1.92 | + | 7.54E-05 | 9.10<br>E-03 |
| <a href="#">cell-cell signaling</a>                                      | <a href="#">1083</a> | <a href="#">4</a><br><a href="#">3</a> | 23.5<br>1 | 1.83 | + | 2.56E-04 | 2.36<br>E-02 |

|                                                                                        |                      |                                                             |           |        |   |          |              |
|----------------------------------------------------------------------------------------|----------------------|-------------------------------------------------------------|-----------|--------|---|----------|--------------|
| <a href="#">regulation of apoptotic process</a>                                        | <a href="#">1468</a> | <a href="#">5</a><br><a href="#">4</a>                      | 31.8<br>7 | 1.69   | + | 2.00E-04 | 1.98<br>E-02 |
| ↳ <a href="#">regulation of programmed cell death</a>                                  | <a href="#">1498</a> | <a href="#">5</a><br><a href="#">4</a>                      | 32.5<br>2 | 1.66   | + | 3.30E-04 | 2.81<br>E-02 |
| <a href="#">regulation of localization</a>                                             | <a href="#">2104</a> | <a href="#">7</a><br><a href="#">0</a>                      | 45.6<br>8 | 1.53   | + | 3.89E-04 | 3.16<br>E-02 |
| <a href="#">regulation of molecular function</a>                                       | <a href="#">3094</a> | <a href="#">1</a><br><a href="#">0</a><br><a href="#">2</a> | 67.1<br>7 | 1.52   | + | 1.80E-05 | 3.04<br>E-03 |
| <a href="#">cell cycle</a>                                                             | <a href="#">1249</a> | <a href="#">1</a><br><a href="#">1</a>                      | 27.1<br>2 | .41    | - | 5.72E-04 | 4.29<br>E-02 |
| Unclassified                                                                           | <a href="#">2725</a> | <a href="#">2</a><br><a href="#">2</a>                      | 59.1<br>6 | .37    | - | 1.41E-08 | 6.33<br>E-06 |
| <a href="#">RNA processing</a>                                                         | <a href="#">868</a>  | <a href="#">4</a>                                           | 18.8<br>4 | .21    | - | 6.26E-05 | 7.85<br>E-03 |
| ↳ <a href="#">gene expression</a>                                                      | <a href="#">2314</a> | <a href="#">2</a><br><a href="#">2</a>                      | 50.2<br>4 | .44    | - | 5.95E-06 | 1.24<br>E-03 |
| ↳ <a href="#">RNA metabolic process</a>                                                | <a href="#">1635</a> | <a href="#">1</a><br><a href="#">5</a>                      | 35.5<br>0 | .42    | - | 1.17E-04 | 1.32<br>E-02 |
| ↳ <a href="#">nucleic acid metabolic process</a>                                       | <a href="#">2276</a> | <a href="#">2</a><br><a href="#">3</a>                      | 49.4<br>1 | .47    | - | 2.19E-05 | 3.57<br>E-03 |
| ↳ <a href="#">nucleobase-containing compound metabolic process</a>                     | <a href="#">2825</a> | <a href="#">3</a><br><a href="#">4</a>                      | 61.3<br>3 | .55    | - | 8.65E-05 | 1.02<br>E-02 |
| ↳ <a href="#">organic cyclic compound metabolic process</a>                            | <a href="#">3292</a> | <a href="#">4</a><br><a href="#">1</a>                      | 71.4<br>7 | .57    | - | 4.51E-05 | 6.09<br>E-03 |
| ↳ <a href="#">heterocycle metabolic process</a>                                        | <a href="#">2999</a> | <a href="#">3</a><br><a href="#">5</a>                      | 65.1<br>1 | .54    | - | 2.22E-05 | 3.59<br>E-03 |
| ↳ <a href="#">cellular aromatic compound metabolic process</a>                         | <a href="#">3050</a> | <a href="#">3</a><br><a href="#">7</a>                      | 66.2<br>2 | .56    | - | 4.66E-05 | 6.20<br>E-03 |
| ↳ <a href="#">cellular nitrogen compound metabolic process</a>                         | <a href="#">3573</a> | <a href="#">4</a><br><a href="#">4</a>                      | 77.5<br>7 | .57    | - | 1.13E-05 | 2.11<br>E-03 |
| <a href="#">ncRNA metabolic process</a>                                                | <a href="#">536</a>  | <a href="#">1</a>                                           | 11.6<br>4 | .09    | - | 2.02E-04 | 1.98<br>E-02 |
| <a href="#">detection of chemical stimulus involved in sensory perception of smell</a> | <a href="#">443</a>  | <a href="#">0</a>                                           | 9.62      | < 0.01 | - | 1.50E-04 | 1.59<br>E-02 |
| ↳ <a href="#">detection of chemical stimulus involved in sensory perception</a>        | <a href="#">489</a>  | <a href="#">0</a>                                           | 10.6<br>2 | < 0.01 | - | 4.37E-05 | 5.96<br>E-03 |
| ↳ <a href="#">detection of chemical stimulus</a>                                       | <a href="#">526</a>  | <a href="#">0</a>                                           | 11.4<br>2 | < 0.01 | - | 1.99E-05 | 3.32<br>E-03 |
| ↳ <a href="#">sensory perception of chemical stimulus</a>                              | <a href="#">551</a>  | <a href="#">1</a>                                           | 11.9<br>6 | .08    | - | 1.38E-04 | 1.49<br>E-02 |
