# Supplementary material for: Unravelling the Impact of Cyclic Mechanical Stretch in Keratoconus—A Transcriptomic Profiling Study
Source: MDPI journal article supplement (doi:10.3390/ijms24087437), 2023-04-18
Supplement: s1 [file s1]

**Supplementary Table S12.** Reactome pathways for KC-altered genes responsive to TGFβ1 treatment (FDR ≤ 0.05).

PANTHER Reactome pathways

Homo sapiens (REF)

Client Text Box Input

▼

Hierarchy

NEW!

?

| Reactome pathways                                     | #                                       | #                                      | expecte<br>d | Fold<br>Enrichment | +/<br>- | raw P<br>value | FDR      |
|-------------------------------------------------------|-----------------------------------------|----------------------------------------|--------------|--------------------|---------|----------------|----------|
| <a href="#">Interferon alpha/beta signaling</a>       | <a href="#">68</a>                      | <a href="#">9</a>                      | .65          | 13.83              | +       | 4.75E-08       | 1.19E-04 |
| ↳ <a href="#">Interferon Signaling</a>                | <a href="#">19</a><br><a href="#">7</a> | <a href="#">1</a><br><a href="#">1</a> | 1.88         | 5.84               | +       | 4.99E-06       | 6.22E-03 |
| ↳ <a href="#">Cytokine Signaling in Immune system</a> | <a href="#">69</a><br><a href="#">7</a> | <a href="#">2</a><br><a href="#">0</a> | 6.67         | 3.00               | +       | 1.68E-05       | 1.40E-02 |

DAVID Reactome pathways

| Sublist                  | Category         | Term                                                | RT                 | Genes | Count | %    | P-Value | FDR    | Fisher Exact |
|--------------------------|------------------|-----------------------------------------------------|--------------------|-------|-------|------|---------|--------|--------------|
| <input type="checkbox"/> | REACTOME_PATHWAY | <a href="#">Interferon alpha/beta signaling</a>     | <a href="#">RT</a> |       | 10    | 5.1  | 4.9E-8  | 2.5E-5 | 3.3E-9       |
| <input type="checkbox"/> | REACTOME_PATHWAY | <a href="#">Interferon Signaling</a>                | <a href="#">RT</a> |       | 11    | 5.6  | 4.2E-5  | 1.1E-2 | 7.5E-6       |
| <input type="checkbox"/> | REACTOME_PATHWAY | <a href="#">Cytokine Signaling in Immune system</a> | <a href="#">RT</a> |       | 20    | 10.3 | 1.5E-4  | 2.6E-2 | 5.6E-5       |
| <input type="checkbox"/> | REACTOME_PATHWAY | <a href="#">Extracellular matrix organization</a>   | <a href="#">RT</a> |       | 12    | 6.2  | 2.7E-4  | 3.5E-2 | 6.8E-5       |
