# Supplementary material for: Unravelling the Impact of Cyclic Mechanical Stretch in Keratoconus—A Transcriptomic Profiling Study
Source: MDPI journal article supplement (doi:10.3390/ijms24087437), 2023-04-18
Supplement: s1 [file s1]

**Supplementary Table S11.** Cellular component gene ontology terms for KC-altered genes responsive to TGFβ1 treatment (FDR ≤ 0.05).

|                                                            | <a href="#">Homo sapiens</a> (REF) | Client Text Box Input ( <a href="#">▼</a> <a href="#">Hierarchy</a> <a href="#">NEW!</a> <a href="#">?</a> ) |                          |                                 |                     |                             |                     |
|------------------------------------------------------------|------------------------------------|--------------------------------------------------------------------------------------------------------------|--------------------------|---------------------------------|---------------------|-----------------------------|---------------------|
| <a href="#">GO cellular component complete</a>             | #                                  | #                                                                                                            | <a href="#">expected</a> | <a href="#">Fold Enrichment</a> | <a href="#">+/-</a> | <a href="#">raw P value</a> | <a href="#">FDR</a> |
| <a href="#">basement membrane</a>                          | <a href="#">101</a>                | <a href="#">9</a>                                                                                            | .97                      | 9.31                            | +                   | 1.05E-06                    | 3.05E-04            |
| ↳ <a href="#">collagen-containing extracellular matrix</a> | <a href="#">434</a>                | <a href="#">24</a>                                                                                           | 4.15                     | 5.78                            | +                   | 1.23E-11                    | 8.37E-09            |
| ↳ <a href="#">extracellular matrix</a>                     | <a href="#">575</a>                | <a href="#">31</a>                                                                                           | 5.50                     | 5.63                            | +                   | 1.75E-14                    | 3.58E-11            |
| ↳ <a href="#">external encapsulating structure</a>         | <a href="#">576</a>                | <a href="#">31</a>                                                                                           | 5.51                     | 5.62                            | +                   | 1.83E-14                    | 1.87E-11            |
| ↳ <a href="#">cell periphery</a>                           | <a href="#">6460</a>               | <a href="#">102</a>                                                                                          | 61.81                    | 1.65                            | +                   | 4.36E-09                    | 1.78E-06            |
| <a href="#">anchored component of membrane</a>             | <a href="#">171</a>                | <a href="#">9</a>                                                                                            | 1.64                     | 5.50                            | +                   | 5.69E-05                    | 1.45E-02            |
| <a href="#">extracellular space</a>                        | <a href="#">3430</a>               | <a href="#">65</a>                                                                                           | 32.82                    | 1.98                            | +                   | 2.52E-08                    | 8.57E-06            |
| ↳ <a href="#">extracellular region</a>                     | <a href="#">4396</a>               | <a href="#">82</a>                                                                                           | 42.06                    | 1.95                            | +                   | 2.38E-10                    | 1.21E-07            |
