# Supplementary material for: Unravelling the Impact of Cyclic Mechanical Stretch in Keratoconus—A Transcriptomic Profiling Study
Source: MDPI journal article supplement (doi:10.3390/ijms24087437), 2023-04-18
Supplement: s1 [file s1]

**Supplementary Table S6.** PANTHER pathways for 479 DEGs from HKCs (TGFβ1 + CMS) vs. HCFs (TGFβ1 + CMS) (FDR ≤ 0.05).

| <a href="#">Client Text Box Input</a>       |                       |                     |                          |                                 |                     |                             |                     |
|---------------------------------------------|-----------------------|---------------------|--------------------------|---------------------------------|---------------------|-----------------------------|---------------------|
| <a href="#">Homo sapiens</a> (REF)          |                       |                     |                          |                                 |                     |                             |                     |
| <a href="#">PANTHER Pathways</a>            | <a href="#">#</a>     | <a href="#">#</a>   | <a href="#">expected</a> | <a href="#">Fold Enrichment</a> | <a href="#">+/-</a> | <a href="#">raw P value</a> | <a href="#">FDR</a> |
| <a href="#">Cadherin signaling pathway</a>  | <a href="#">166</a>   | <a href="#">19</a>  | 3.60                     | 5.27                            | +                   | 1.67E-08                    | 2.67E-06            |
| <a href="#">Integrin signalling pathway</a> | <a href="#">200</a>   | <a href="#">16</a>  | 4.34                     | 3.68                            | +                   | 1.65E-05                    | 1.32E-03            |
| <a href="#">Wnt signaling pathway</a>       | <a href="#">314</a>   | <a href="#">20</a>  | 6.82                     | 2.93                            | +                   | 3.47E-05                    | 1.85E-03            |
| Unclassified                                | <a href="#">17971</a> | <a href="#">359</a> | 390.16                   | .92                             | -                   | 4.21E-05                    | 1.68E-03            |
