# Supplementary material for: Unravelling the Impact of Cyclic Mechanical Stretch in Keratoconus—A Transcriptomic Profiling Study
Source: MDPI journal article supplement (doi:10.3390/ijms24087437), 2023-04-18
Supplement: s1 [file s1]

**Supplementary Table S5.** Cellular component gene ontology terms for 479 DEGs from HKCs (TGFβ1 + CMS) vs. HCFs (TGFβ1 + CMS) (FDR ≤ 0.05).

|                                                            | Homo sapiens (REF)    | Client Text Box Input (▼ Hierarchy NEW! ?) |          |                 |     |             |          |
|------------------------------------------------------------|-----------------------|--------------------------------------------|----------|-----------------|-----|-------------|----------|
| GO cellular component complete                             | #                     | #                                          | expected | Fold Enrichment | +/- | raw P value | FDR      |
| <a href="#">interstitial matrix</a>                        | <a href="#">12</a>    | <a href="#">4</a>                          | .26      | 15.35           | +   | 2.99E-04    | 2.35E-02 |
| ↳ <a href="#">collagen-containing extracellular matrix</a> | <a href="#">434</a>   | <a href="#">44</a>                         | 9.42     | 4.67            | +   | 2.86E-16    | 1.46E-13 |
| ↳ <a href="#">extracellular matrix</a>                     | <a href="#">575</a>   | <a href="#">57</a>                         | 12.48    | 4.57            | +   | 2.06E-20    | 4.21E-17 |
| ↳ <a href="#">external encapsulating structure</a>         | <a href="#">576</a>   | <a href="#">57</a>                         | 12.51    | 4.56            | +   | 2.22E-20    | 2.27E-17 |
| ↳ <a href="#">cell periphery</a>                           | <a href="#">6460</a>  | <a href="#">235</a>                        | 140.25   | 1.68            | +   | 6.44E-20    | 4.39E-17 |
| ↳ <a href="#">cellular anatomical entity</a>               | <a href="#">18802</a> | <a href="#">432</a>                        | 408.20   | 1.06            | +   | 1.59E-05    | 1.92E-03 |
| <a href="#">microfibril</a>                                | <a href="#">13</a>    | <a href="#">4</a>                          | .28      | 14.17           | +   | 3.84E-04    | 2.91E-02 |
| <a href="#">basement membrane</a>                          | <a href="#">101</a>   | <a href="#">13</a>                         | 2.19     | 5.93            | +   | 9.36E-07    | 1.74E-04 |
| <a href="#">adherens junction</a>                          | <a href="#">180</a>   | <a href="#">14</a>                         | 3.91     | 3.58            | +   | 7.34E-05    | 6.52E-03 |
| ↳ <a href="#">cell-cell junction</a>                       | <a href="#">508</a>   | <a href="#">29</a>                         | 11.03    | 2.63            | +   | 4.81E-06    | 6.55E-04 |
| ↳ <a href="#">anchoring junction</a>                       | <a href="#">1336</a>  | <a href="#">59</a>                         | 29.01    | 2.03            | +   | 3.91E-07    | 7.99E-05 |
| ↳ <a href="#">cell junction</a>                            | <a href="#">2136</a>  | <a href="#">80</a>                         | 46.37    | 1.73            | +   | 2.36E-06    | 4.01E-04 |
| <a href="#">endoplasmic reticulum lumen</a>                | <a href="#">314</a>   | <a href="#">20</a>                         | 6.82     | 2.93            | +   | 3.47E-05    | 3.73E-03 |
| ↳ <a href="#">cytoplasm</a>                                | <a href="#">12097</a> | <a href="#">304</a>                        | 262.63   | 1.16            | +   | 7.93E-05    | 6.75E-03 |
| <a href="#">actin cytoskeleton</a>                         | <a href="#">510</a>   | <a href="#">24</a>                         | 11.07    | 2.17            | +   | 6.22E-04    | 4.38E-02 |
| <a href="#">plasma membrane region</a>                     | <a href="#">1257</a>  | <a href="#">53</a>                         | 27.29    | 1.94            | +   | 6.42E-06    | 8.20E-04 |
| ↳ <a href="#">plasma membrane</a>                          | <a href="#">5977</a>  | <a href="#">191</a>                        | 129.76   | 1.47            | +   | 1.19E-09    | 3.47E-07 |

|                                                            |                      |                                         |        |      |   |          |          |
|------------------------------------------------------------|----------------------|-----------------------------------------|--------|------|---|----------|----------|
| ↳ <a href="#">membrane</a>                                 | <a href="#">9956</a> | <a href="#">25</a><br><a href="#">4</a> | 216.15 | 1.18 | + | 4.68E-04 | 3.41E-02 |
| <a href="#">integral component of plasma membrane</a>      | <a href="#">1724</a> | <a href="#">71</a>                      | 37.43  | 1.90 | + | 3.11E-07 | 7.07E-05 |
| ↳ <a href="#">intrinsic component of plasma membrane</a>   | <a href="#">1806</a> | <a href="#">74</a>                      | 39.21  | 1.89 | + | 2.17E-07 | 5.55E-05 |
| <a href="#">extracellular exosome</a>                      | <a href="#">2100</a> | <a href="#">75</a>                      | 45.59  | 1.65 | + | 2.72E-05 | 3.09E-03 |
| ↳ <a href="#">extracellular vesicle</a>                    | <a href="#">2123</a> | <a href="#">75</a>                      | 46.09  | 1.63 | + | 4.20E-05 | 4.29E-03 |
| ↳ <a href="#">extracellular membrane-bounded organelle</a> | <a href="#">2124</a> | <a href="#">75</a>                      | 46.11  | 1.63 | + | 4.22E-05 | 3.92E-03 |
| ↳ <a href="#">extracellular organelle</a>                  | <a href="#">2124</a> | <a href="#">75</a>                      | 46.11  | 1.63 | + | 4.22E-05 | 4.10E-03 |
| ↳ <a href="#">extracellular region</a>                     | <a href="#">4396</a> | <a href="#">16</a><br><a href="#">9</a> | 95.44  | 1.77 | + | 5.04E-15 | 2.06E-12 |
| ↳ <a href="#">vesicle</a>                                  | <a href="#">3975</a> | <a href="#">12</a><br><a href="#">1</a> | 86.30  | 1.40 | + | 8.19E-05 | 6.69E-03 |
| ↳ <a href="#">extracellular space</a>                      | <a href="#">3430</a> | <a href="#">13</a><br><a href="#">3</a> | 74.47  | 1.79 | + | 1.21E-11 | 4.12E-09 |
| Unclassified                                               | <a href="#">1640</a> | <a href="#">12</a>                      | 35.61  | .34  | - | 4.74E-06 | 7.45E-04 |
| <a href="#">mitochondrial matrix</a>                       | <a href="#">486</a>  | <a href="#">1</a>                       | 10.55  | .09  | - | 6.31E-04 | 4.30E-02 |
