# Supplementary material for: Unravelling the Impact of Cyclic Mechanical Stretch in Keratoconus—A Transcriptomic Profiling Study
Source: MDPI journal article supplement (doi:10.3390/ijms24087437), 2023-04-18
Supplement: s1 [file s1]

**Supplementary Table S10.** Molecular function gene ontology terms for 199 KC-altered genes responsive to TGFβ1 treatment (FDR ≤ 0.05).

|                                                             | <a href="#">Homo sapiens</a> (REF) | <a href="#">Client Text Box Input</a> ( <a href="#">▼ Hierarchy</a> <b>NEW!</b> <a href="#">?</a> ) |                           |                                 |                     |                             |                     |
|-------------------------------------------------------------|------------------------------------|-----------------------------------------------------------------------------------------------------|---------------------------|---------------------------------|---------------------|-----------------------------|---------------------|
| <a href="#">GO molecular function complete</a>              | #                                  | #                                                                                                   | <a href="#">expect ed</a> | <a href="#">Fold Enrichment</a> | <a href="#">+/-</a> | <a href="#">raw P value</a> | <a href="#">FDR</a> |
| <a href="#">extracellular matrix structural constituent</a> | <a href="#">174</a>                | <a href="#">13</a>                                                                                  | 1.66                      | 7.81                            | +                   | 2.84E-08                    | 1.41E-04            |
| <a href="#">protein binding</a>                             | <a href="#">14448</a>              | <a href="#">169</a>                                                                                 | 138.24                    | 1.22                            | +                   | 5.86E-07                    | 9.71E-04            |
| <a href="#">binding</a>                                     | <a href="#">16594</a>              | <a href="#">186</a>                                                                                 | 158.77                    | 1.17                            | +                   | 4.99E-08                    | 1.24E-04            |
| Unclassified                                                | <a href="#">2297</a>               | <a href="#">5</a>                                                                                   | 21.98                     | .23                             | -                   | 1.70E-05                    | 2.11E-02            |
