# Supplementary material for: Unravelling the Impact of Cyclic Mechanical Stretch in Keratoconus—A Transcriptomic Profiling Study
Source: MDPI journal article supplement (doi:10.3390/ijms24087437), 2023-04-18
Supplement: s1 [file s1]

**Supplementary Table S4.** Molecular function gene ontology terms for 479 DEGs from HKCs (TGFβ1 + CMS) vs. HCFs (TGFβ1 + CMS) (FDR ≤ 0.05).

|                                                             | <a href="#">Homo sapiens</a> (REF) | Client Text Box Input ( <a href="#">Hierarchy</a> <b>NEW!</b> <a href="#">?</a> ) |                          |                                 |                     |                             |                     |
|-------------------------------------------------------------|------------------------------------|-----------------------------------------------------------------------------------|--------------------------|---------------------------------|---------------------|-----------------------------|---------------------|
| <a href="#">GO molecular function complete</a>              | #                                  | #                                                                                 | <a href="#">expected</a> | <a href="#">Fold Enrichment</a> | <a href="#">+/-</a> | <a href="#">raw P value</a> | <a href="#">FDR</a> |
| <a href="#">TAP binding</a>                                 | <a href="#">8</a>                  | <a href="#">4</a>                                                                 | .17                      | 23.03                           | +                   | 8.70E-05                    | 3.33E-02            |
| ↳ <a href="#">protein binding</a>                           | <a href="#">14448</a>              | <a href="#">367</a>                                                               | 313.68                   | 1.17                            | +                   | 1.27E-08                    | 2.10E-05            |
| ↳ <a href="#">binding</a>                                   | <a href="#">16594</a>              | <a href="#">412</a>                                                               | 360.27                   | 1.14                            | +                   | 2.05E-11                    | 1.02E-07            |
| <a href="#">extracellular matrix binding</a>                | <a href="#">56</a>                 | <a href="#">8</a>                                                                 | 1.22                     | 6.58                            | +                   | 6.10E-05                    | 2.53E-02            |
| <a href="#">extracellular matrix structural constituent</a> | <a href="#">174</a>                | <a href="#">21</a>                                                                | 3.78                     | 5.56                            | +                   | 1.24E-09                    | 3.08E-06            |
| <a href="#">integrin binding</a>                            | <a href="#">159</a>                | <a href="#">14</a>                                                                | 3.45                     | 4.06                            | +                   | 2.08E-05                    | 1.15E-02            |
| ↳ <a href="#">signaling receptor binding</a>                | <a href="#">1602</a>               | <a href="#">69</a>                                                                | 34.78                    | 1.98                            | +                   | 1.13E-07                    | 9.38E-05            |
| <a href="#">glycosaminoglycan binding</a>                   | <a href="#">242</a>                | <a href="#">16</a>                                                                | 5.25                     | 3.05                            | +                   | 1.39E-04                    | 4.93E-02            |
| <a href="#">actin binding</a>                               | <a href="#">451</a>                | <a href="#">27</a>                                                                | 9.79                     | 2.76                            | +                   | 4.52E-06                    | 3.21E-03            |
| ↳ <a href="#">cytoskeletal protein binding</a>              | <a href="#">1006</a>               | <a href="#">45</a>                                                                | 21.84                    | 2.06                            | +                   | 8.15E-06                    | 5.07E-03            |
| <a href="#">signaling receptor regulator activity</a>       | <a href="#">553</a>                | <a href="#">28</a>                                                                | 12.01                    | 2.33                            | +                   | 5.75E-05                    | 2.60E-02            |
| <a href="#">calcium ion binding</a>                         | <a href="#">735</a>                | <a href="#">35</a>                                                                | 15.96                    | 2.19                            | +                   | 3.01E-05                    | 1.50E-02            |
| Unclassified                                                | <a href="#">2297</a>               | <a href="#">16</a>                                                                | 49.87                    | .32                             | -                   | 1.56E-08                    | 1.55E-05            |
| <a href="#">olfactory receptor activity</a>                 | <a href="#">441</a>                | <a href="#">0</a>                                                                 | 9.57                     | < 0.01                          | -                   | 1.48E-04                    | 4.91E-02            |
