# Supplementary material for: Unravelling the Impact of Cyclic Mechanical Stretch in Keratoconus—A Transcriptomic Profiling Study
Source: MDPI journal article supplement (doi:10.3390/ijms24087437), 2023-04-18
Supplement: s1 [file s1]

**Supplementary Table S9.** Biological process gene ontology terms for 199 KC-altered genes responsive to TGFβ1 treatment (FDR ≤ 0.05).

|                                                                                            | Homo sapiens (REF)    |                     | Client Text Box Input (Hierarchy NEW! ?) |                 |     |             |          |
|--------------------------------------------------------------------------------------------|-----------------------|---------------------|------------------------------------------|-----------------|-----|-------------|----------|
| <a href="#">GO biological process complete</a>                                             | #                     | #                   | expected                                 | Fold Enrichment | +/- | raw P value | FDR      |
| <a href="#">positive regulation of Wnt signaling pathway, planar cell polarity pathway</a> | <a href="#">9</a>     | <a href="#">3</a>   | .09                                      | 34.84           | +   | 1.73E-04    | 3.94E-02 |
| ↳ <a href="#">regulation of signal transduction</a>                                        | <a href="#">2989</a>  | <a href="#">53</a>  | 28.60                                    | 1.85            | +   | 6.33E-06    | 3.82E-03 |
| ↳ <a href="#">regulation of response to stimulus</a>                                       | <a href="#">4034</a>  | <a href="#">67</a>  | 38.60                                    | 1.74            | +   | 2.19E-06    | 3.12E-03 |
| ↳ <a href="#">regulation of biological process</a>                                         | <a href="#">11806</a> | <a href="#">143</a> | 112.96                                   | 1.27            | +   | 1.23E-05    | 6.42E-03 |
| ↳ <a href="#">biological regulation</a>                                                    | <a href="#">12544</a> | <a href="#">148</a> | 120.02                                   | 1.23            | +   | 3.52E-05    | 1.32E-02 |
| ↳ <a href="#">regulation of cell communication</a>                                         | <a href="#">3369</a>  | <a href="#">55</a>  | 32.24                                    | 1.71            | +   | 4.42E-05    | 1.51E-02 |
| ↳ <a href="#">regulation of cellular process</a>                                           | <a href="#">11187</a> | <a href="#">133</a> | 107.04                                   | 1.24            | +   | 2.29E-04    | 4.67E-02 |
| ↳ <a href="#">regulation of signaling</a>                                                  | <a href="#">3381</a>  | <a href="#">56</a>  | 32.35                                    | 1.73            | +   | 2.74E-05    | 1.16E-02 |
| ↳ <a href="#">positive regulation of biological process</a>                                | <a href="#">6304</a>  | <a href="#">88</a>  | 60.32                                    | 1.46            | +   | 3.59E-05    | 1.31E-02 |
| ↳ <a href="#">regulation of anatomical structure morphogenesis</a>                         | <a href="#">924</a>   | <a href="#">24</a>  | 8.84                                     | 2.71            | +   | 1.17E-05    | 6.31E-03 |
| ↳ <a href="#">regulation of developmental process</a>                                      | <a href="#">2489</a>  | <a href="#">43</a>  | 23.82                                    | 1.81            | +   | 1.61E-04    | 3.72E-02 |
| <a href="#">protein mono-ADP-ribosylation</a>                                              | <a href="#">12</a>    | <a href="#">4</a>   | .11                                      | 34.84           | +   | 1.30E-05    | 6.38E-03 |
| ↳ <a href="#">protein ADP-ribosylation</a>                                                 | <a href="#">29</a>    | <a href="#">4</a>   | .28                                      | 14.42           | +   | 2.58E-04    | 5.00E-02 |
| <a href="#">fibroblast migration</a>                                                       | <a href="#">19</a>    | <a href="#">4</a>   | .18                                      | 22.00           | +   | 6.02E-05    | 1.93E-02 |
| ↳ <a href="#">ameboidal-type cell migration</a>                                            | <a href="#">201</a>   | <a href="#">9</a>   | 1.92                                     | 4.68            | +   | 1.84E-04    | 4.06E-02 |
| <a href="#">negative regulation of axon extension involved in axon guidance</a>            | <a href="#">27</a>    | <a href="#">4</a>   | .26                                      | 15.48           | +   | 2.02E-04    | 4.33E-02 |

|                                                                                       |                      |                                        |           |       |   |          |          |
|---------------------------------------------------------------------------------------|----------------------|----------------------------------------|-----------|-------|---|----------|----------|
| <a href="#">negative regulation of cellular process</a>                               | <a href="#">4732</a> | <a href="#">7</a><br><a href="#">1</a> | 45.2<br>8 | 1.57  | + | 3.94E-05 | 1.37E-02 |
| <a href="#">negative regulation of biological process</a>                             | <a href="#">5314</a> | <a href="#">8</a><br><a href="#">1</a> | 50.8<br>5 | 1.59  | + | 3.78E-06 | 3.12E-03 |
| <a href="#">regulation of multicellular organismal development</a>                    | <a href="#">1383</a> | <a href="#">2</a><br><a href="#">9</a> | 13.2<br>3 | 2.19  | + | 8.14E-05 | 2.36E-02 |
| <a href="#">regulation of multicellular organismal process</a>                        | <a href="#">2750</a> | <a href="#">5</a><br><a href="#">1</a> | 26.3<br>1 | 1.94  | + | 2.79E-06 | 2.57E-03 |
| <a href="#">negative regulation of response to external stimulus</a>                  | <a href="#">391</a>  | <a href="#">1</a><br><a href="#">3</a> | 3.74      | 3.47  | + | 1.34E-04 | 3.22E-02 |
| <a href="#">regulation of response to external stimulus</a>                           | <a href="#">973</a>  | <a href="#">2</a><br><a href="#">3</a> | 9.31      | 2.47  | + | 7.42E-05 | 2.20E-02 |
| <a href="#">negative regulation of response to stimulus</a>                           | <a href="#">1620</a> | <a href="#">3</a><br><a href="#">4</a> | 15.5<br>0 | 2.19  | + | 1.56E-05 | 7.21E-03 |
| <a href="#">regulation of locomotion</a>                                              | <a href="#">1034</a> | <a href="#">2</a><br><a href="#">3</a> | 9.89      | 2.32  | + | 2.11E-04 | 4.41E-02 |
| <a href="#">positive regulation of defense response to virus by host</a>              | <a href="#">34</a>   | <a href="#">5</a>                      | .33       | 15.37 | + | 3.22E-05 | 1.23E-02 |
| <a href="#">regulation of defense response to virus by host</a>                       | <a href="#">45</a>   | <a href="#">5</a>                      | .43       | 11.61 | + | 1.09E-04 | 2.85E-02 |
| <a href="#">regulation of defense response to virus</a>                               | <a href="#">76</a>   | <a href="#">7</a>                      | .73       | 9.63  | + | 1.39E-05 | 6.63E-03 |
| <a href="#">regulation of defense response</a>                                        | <a href="#">642</a>  | <a href="#">1</a><br><a href="#">9</a> | 6.14      | 3.09  | + | 1.83E-05 | 8.18E-03 |
| <a href="#">regulation of response to biotic stimulus</a>                             | <a href="#">364</a>  | <a href="#">1</a><br><a href="#">5</a> | 3.48      | 4.31  | + | 3.55E-06 | 3.09E-03 |
| <a href="#">negative regulation of viral genome replication</a>                       | <a href="#">57</a>   | <a href="#">7</a>                      | .55       | 12.83 | + | 2.43E-06 | 2.54E-03 |
| <a href="#">regulation of viral genome replication</a>                                | <a href="#">87</a>   | <a href="#">7</a>                      | .83       | 8.41  | + | 3.15E-05 | 1.23E-02 |
| <a href="#">regulation of viral life cycle</a>                                        | <a href="#">142</a>  | <a href="#">8</a>                      | 1.36      | 5.89  | + | 9.42E-05 | 2.50E-02 |
| <a href="#">regulation of viral process</a>                                           | <a href="#">164</a>  | <a href="#">1</a><br><a href="#">0</a> | 1.57      | 6.37  | + | 6.53E-06 | 3.79E-03 |
| <a href="#">negative regulation of viral process</a>                                  | <a href="#">95</a>   | <a href="#">1</a><br><a href="#">0</a> | .91       | 11.00 | + | 6.15E-08 | 2.41E-04 |
| <a href="#">positive regulation of pattern recognition receptor signaling pathway</a> | <a href="#">46</a>   | <a href="#">5</a>                      | .44       | 11.36 | + | 1.20E-04 | 2.98E-02 |

|                                                                                             |                      |                     |       |       |   |          |          |
|---------------------------------------------------------------------------------------------|----------------------|---------------------|-------|-------|---|----------|----------|
| <a href="#">response to type I interferon</a>                                               | <a href="#">52</a>   | <a href="#">5</a>   | .50   | 10.05 | + | 2.04E-04 | 4.32E-02 |
| ↳ <a href="#">response to stimulus</a>                                                      | <a href="#">8209</a> | <a href="#">108</a> | 78.55 | 1.37  | + | 2.78E-05 | 1.15E-02 |
| ↳ <a href="#">innate immune response</a>                                                    | <a href="#">832</a>  | <a href="#">25</a>  | 7.96  | 3.14  | + | 6.09E-07 | 1.36E-03 |
| ↳ <a href="#">defense response to other organism</a>                                        | <a href="#">1068</a> | <a href="#">28</a>  | 10.22 | 2.74  | + | 1.70E-06 | 2.66E-03 |
| ↳ <a href="#">response to other organism</a>                                                | <a href="#">1429</a> | <a href="#">34</a>  | 13.67 | 2.49  | + | 1.52E-06 | 2.98E-03 |
| ↳ <a href="#">biological process involved in interspecies interaction between organisms</a> | <a href="#">1602</a> | <a href="#">34</a>  | 15.33 | 2.22  | + | 1.30E-05 | 6.56E-03 |
| ↳ <a href="#">response to external biotic stimulus</a>                                      | <a href="#">1432</a> | <a href="#">34</a>  | 13.70 | 2.48  | + | 1.55E-06 | 2.71E-03 |
| ↳ <a href="#">response to biotic stimulus</a>                                               | <a href="#">1478</a> | <a href="#">34</a>  | 14.14 | 2.40  | + | 2.39E-06 | 2.68E-03 |
| ↳ <a href="#">response to external stimulus</a>                                             | <a href="#">2469</a> | <a href="#">47</a>  | 23.62 | 1.99  | + | 4.43E-06 | 3.31E-03 |
| ↳ <a href="#">defense response</a>                                                          | <a href="#">1478</a> | <a href="#">33</a>  | 14.14 | 2.33  | + | 5.90E-06 | 3.70E-03 |
| ↳ <a href="#">immune response</a>                                                           | <a href="#">1621</a> | <a href="#">35</a>  | 15.51 | 2.26  | + | 7.04E-06 | 3.94E-03 |
| ↳ <a href="#">immune system process</a>                                                     | <a href="#">2429</a> | <a href="#">47</a>  | 23.24 | 2.02  | + | 2.38E-06 | 2.87E-03 |
| <a href="#">negative regulation of innate immune response</a>                               | <a href="#">76</a>   | <a href="#">6</a>   | .73   | 8.25  | + | 1.29E-04 | 3.17E-02 |
| <a href="#">neural crest cell development</a>                                               | <a href="#">81</a>   | <a href="#">6</a>   | .78   | 7.74  | + | 1.79E-04 | 4.02E-02 |
| ↳ <a href="#">stem cell development</a>                                                     | <a href="#">87</a>   | <a href="#">6</a>   | .83   | 7.21  | + | 2.58E-04 | 4.94E-02 |
| ↳ <a href="#">stem cell differentiation</a>                                                 | <a href="#">183</a>  | <a href="#">9</a>   | 1.75  | 5.14  | + | 9.35E-05 | 2.57E-02 |
| ↳ <a href="#">developmental process</a>                                                     | <a href="#">5677</a> | <a href="#">80</a>  | 54.32 | 1.47  | + | 8.24E-05 | 2.35E-02 |
| ↳ <a href="#">anatomical structure development</a>                                          | <a href="#">5144</a> | <a href="#">73</a>  | 49.22 | 1.48  | + | 1.87E-04 | 4.07E-02 |
| ↳ <a href="#">neural crest cell differentiation</a>                                         | <a href="#">94</a>   | <a href="#">7</a>   | .90   | 7.78  | + | 5.01E-05 | 1.67E-02 |
| ↳ <a href="#">mesenchymal cell differentiation</a>                                          | <a href="#">171</a>  | <a href="#">9</a>   | 1.64  | 5.50  | + | 5.69E-05 | 1.86E-02 |
| ↳ <a href="#">mesenchyme development</a>                                                    | <a href="#">239</a>  | <a href="#">11</a>  | 2.29  | 4.81  | + | 2.80E-05 | 1.13E-02 |

|                                                                      |                      |                                        |           |      |   |          |          |
|----------------------------------------------------------------------|----------------------|----------------------------------------|-----------|------|---|----------|----------|
| <a href="#">↳tissue development</a>                                  | <a href="#">1726</a> | <a href="#">3</a><br><a href="#">7</a> | 16.5<br>1 | 2.24 | + | 3.92E-06 | 3.07E-03 |
| <a href="#">renal tubule development</a>                             | <a href="#">87</a>   | <a href="#">6</a>                      | .83       | 7.21 | + | 2.58E-04 | 4.88E-02 |
| <a href="#">↳multicellular organism development</a>                  | <a href="#">4228</a> | <a href="#">6</a><br><a href="#">6</a> | 40.4<br>5 | 1.63 | + | 2.67E-05 | 1.16E-02 |
| <a href="#">↳renal system development</a>                            | <a href="#">308</a>  | <a href="#">1</a><br><a href="#">5</a> | 2.95      | 5.09 | + | 4.88E-07 | 1.28E-03 |
| <a href="#">↳urogenital system development</a>                       | <a href="#">350</a>  | <a href="#">1</a><br><a href="#">5</a> | 3.35      | 4.48 | + | 2.24E-06 | 2.93E-03 |
| <a href="#">defense response to virus</a>                            | <a href="#">253</a>  | <a href="#">1</a><br><a href="#">7</a> | 2.42      | 7.02 | + | 8.95E-10 | 7.02E-06 |
| <a href="#">↳response to virus</a>                                   | <a href="#">357</a>  | <a href="#">2</a><br><a href="#">2</a> | 3.42      | 6.44 | + | 1.29E-11 | 2.03E-07 |
| <a href="#">↳defense response to symbiont</a>                        | <a href="#">254</a>  | <a href="#">1</a><br><a href="#">7</a> | 2.43      | 6.99 | + | 9.47E-10 | 4.95E-06 |
| <a href="#">kidney development</a>                                   | <a href="#">299</a>  | <a href="#">1</a><br><a href="#">5</a> | 2.86      | 5.24 | + | 3.41E-07 | 1.07E-03 |
| <a href="#">extracellular matrix organization</a>                    | <a href="#">280</a>  | <a href="#">1</a><br><a href="#">3</a> | 2.68      | 4.85 | + | 4.75E-06 | 3.39E-03 |
| <a href="#">↳extracellular structure organization</a>                | <a href="#">281</a>  | <a href="#">1</a><br><a href="#">3</a> | 2.69      | 4.84 | + | 4.93E-06 | 3.36E-03 |
| <a href="#">↳external encapsulating structure organization</a>       | <a href="#">283</a>  | <a href="#">1</a><br><a href="#">3</a> | 2.71      | 4.80 | + | 5.30E-06 | 3.47E-03 |
| <a href="#">blood vessel development</a>                             | <a href="#">510</a>  | <a href="#">1</a><br><a href="#">5</a> | 4.88      | 3.07 | + | 1.53E-04 | 3.57E-02 |
| <a href="#">↳vasculature development</a>                             | <a href="#">532</a>  | <a href="#">1</a><br><a href="#">5</a> | 5.09      | 2.95 | + | 2.38E-04 | 4.71E-02 |
| <a href="#">embryonic morphogenesis</a>                              | <a href="#">591</a>  | <a href="#">1</a><br><a href="#">7</a> | 5.65      | 3.01 | + | 7.19E-05 | 2.21E-02 |
| <a href="#">↳anatomical structure morphogenesis</a>                  | <a href="#">2237</a> | <a href="#">3</a><br><a href="#">9</a> | 21.4<br>0 | 1.82 | + | 2.15E-04 | 4.44E-02 |
| <a href="#">negative regulation of cell population proliferation</a> | <a href="#">713</a>  | <a href="#">1</a><br><a href="#">9</a> | 6.82      | 2.79 | + | 7.24E-05 | 2.18E-02 |
| <a href="#">↳regulation of cell population proliferation</a>         | <a href="#">1674</a> | <a href="#">3</a><br><a href="#">7</a> | 16.0<br>2 | 2.31 | + | 2.49E-06 | 2.44E-03 |
| <a href="#">cell population proliferation</a>                        | <a href="#">718</a>  | <a href="#">1</a><br><a href="#">8</a> | 6.87      | 2.62 | + | 2.35E-04 | 4.71E-02 |
| <a href="#">regulation of cell migration</a>                         | <a href="#">929</a>  | <a href="#">2</a><br><a href="#">3</a> | 8.89      | 2.59 | + | 3.73E-05 | 1.33E-02 |
| <a href="#">↳regulation of cell motility</a>                         | <a href="#">989</a>  | <a href="#">2</a><br><a href="#">3</a> | 9.46      | 2.43 | + | 1.45E-04 | 3.45E-02 |

|                                                                         |                      |                                        |       |      |   |          |          |
|-------------------------------------------------------------------------|----------------------|----------------------------------------|-------|------|---|----------|----------|
| <a href="#">cell adhesion</a>                                           | <a href="#">969</a>  | <a href="#">2</a><br><a href="#">3</a> | 9.27  | 2.48 | + | 6.99E-05 | 2.19E-02 |
| <a href="#">negative regulation of signal transduction</a>              | <a href="#">1257</a> | <a href="#">2</a><br><a href="#">6</a> | 12.03 | 2.16 | + | 2.53E-04 | 4.95E-02 |
| <a href="#">positive regulation of multicellular organismal process</a> | <a href="#">1515</a> | <a href="#">3</a><br><a href="#">1</a> | 14.50 | 2.14 | + | 9.02E-05 | 2.53E-02 |
| <a href="#">cellular response to chemical stimulus</a>                  | <a href="#">2616</a> | <a href="#">4</a><br><a href="#">5</a> | 25.03 | 1.80 | + | 9.36E-05 | 2.53E-02 |
| Unclassified                                                            | <a href="#">2725</a> | <a href="#">9</a>                      | 26.07 | .35  | - | 1.12E-04 | 2.87E-02 |
