# Supplementary material for: Unravelling the Impact of Cyclic Mechanical Stretch in Keratoconus—A Transcriptomic Profiling Study
Source: MDPI journal article supplement (doi:10.3390/ijms24087437), 2023-04-18
Supplement: s1 [file s1]

**Supplementary Table S7.** Reactome pathways for 479 DEGs from HKCs (TGFβ1 + CMS) vs. HCFs (TGFβ1 + CMS) (FDR ≤ 0.05).

| Homo sapiens (REF)                                                |                                           | Client Text Box Input (▼ <a href="#">Hierarchy</a> <b>NEW!</b>  ) |                          |                                 |                     |                             |                     |
|-------------------------------------------------------------------|-------------------------------------------|------------------------------------------------------------------------------------------------------------------------------------------------------|--------------------------|---------------------------------|---------------------|-----------------------------|---------------------|
| <a href="#">Reactome pathways</a>                                 | #                                         | #                                                                                                                                                    | <a href="#">expected</a> | <a href="#">Fold Enrichment</a> | <a href="#">+/-</a> | <a href="#">raw P value</a> | <a href="#">FDR</a> |
| <a href="#">Maturation of nucleoprotein</a>                       | <a href="#">11</a>                        | <a href="#">4</a>                                                                                                                                    | .24                      | 16.75                           | +                   | 2.28E-04                    | 4.06E-02            |
| <a href="#">Interferon alpha/beta signaling</a>                   | <a href="#">68</a>                        | <a href="#">19</a>                                                                                                                                   | 1.48                     | 12.87                           | +                   | 2.10E-14                    | 5.23E-11            |
| ↳ <a href="#">Interferon Signaling</a>                            | <a href="#">197</a>                       | <a href="#">23</a>                                                                                                                                   | 4.28                     | 5.38                            | +                   | 3.61E-10                    | 4.51E-07            |
| ↳ <a href="#">Cytokine Signaling in Immune system</a>             | <a href="#">697</a>                       | <a href="#">36</a>                                                                                                                                   | 15.13                    | 2.38                            | +                   | 4.98E-06                    | 2.48E-03            |
| <a href="#">Laminin interactions</a>                              | <a href="#">30</a>                        | <a href="#">8</a>                                                                                                                                    | .65                      | 12.28                           | +                   | 1.09E-06                    | 6.80E-04            |
| <a href="#">Defective B3GALTL causes PpS</a>                      | <a href="#">38</a>                        | <a href="#">7</a>                                                                                                                                    | .83                      | 8.48                            | +                   | 4.21E-05                    | 1.31E-02            |
| <a href="#">O-glycosylation of TSR domain-containing proteins</a> | <a href="#">39</a>                        | <a href="#">7</a>                                                                                                                                    | .85                      | 8.27                            | +                   | 4.88E-05                    | 1.35E-02            |
| <a href="#">Integrin cell surface interactions</a>                | <a href="#">84</a>                        | <a href="#">11</a>                                                                                                                                   | 1.82                     | 6.03                            | +                   | 5.54E-06                    | 2.30E-03            |
| <a href="#">Interferon gamma signaling</a>                        | <a href="#">91</a>                        | <a href="#">11</a>                                                                                                                                   | 1.98                     | 5.57                            | +                   | 1.11E-05                    | 3.94E-03            |
| <a href="#">Collagen biosynthesis and modifying enzymes</a>       | <a href="#">67</a>                        | <a href="#">8</a>                                                                                                                                    | 1.45                     | 5.50                            | +                   | 1.90E-04                    | 3.64E-02            |
| ↳ <a href="#">Collagen formation</a>                              | <a href="#">89</a>                        | <a href="#">10</a>                                                                                                                                   | 1.93                     | 5.18                            | +                   | 4.90E-05                    | 1.22E-02            |
| <a href="#">Degradation of the extracellular matrix</a>           | <a href="#">140</a>                       | <a href="#">12</a>                                                                                                                                   | 3.04                     | 3.95                            | +                   | 1.02E-04                    | 2.31E-02            |
| Unclassified                                                      | <a href="#">1008</a><br><a href="#">2</a> | <a href="#">17</a><br><a href="#">9</a>                                                                                                              | 218.89                   | .82                             | -                   | 1.87E-04                    | 3.89E-02            |
